# Supplementary material for: Retrospective Analysis of the Correlation of MSI-H/dMMR Status and Response to Therapy for Endometrial Cancer: RAME Study, a Multicenter Experience
Source: Preprints.org preprint supplement (doi:10.20944/preprints202306.0937.v1), 2023-06-13
Supplement: Supplementary file 2 [file supplementary]

# **Table S1. Patients with dMMR (N=63) diagnosed with IHC, details of MMR proteins.**

# **N= numer; MMR= mismatch repair; IHC= immoistochemistry**

| N= 63 | Normal | Absent |
| --- | --- | --- |
| MMR proteins (IHC) |  |  |
| MLH 1 | 13 | 50 |
| PMS 2 | 15 | 48 |
| MSH 2 | 51 | 12 |
| MSH 6 | 51 | 12 |
| Details of N. of absent MMR protein at IHC |  |  |
| 4 absent proteins |  | 4/63 |
| 3 absent proteins |  | 0/63 |
| 2 absent proteins |  | 47/63 |
| MLH1 + PMS2 |  | 40/63 |
| MLH1 + MSH2 |  | 2/63 |
| MSH2 + MSH6 |  | 5/63 |
| 1 absent protein |  |  |
| MLH 1 |  | 4/63 |
| PMS 2 |  | 4/63 |
| MSH 2 |  | 1/63 |
| MSH 6 |  | 3/63 |
